# Supplementary material for: Discovery of a new series of jatrophane and lathyrane diterpenes as potent and specific P-glycoprotein modulators
Source: Royal Society of Chemistry journal article supplement (doi:10.1039/b800485d), 2008-01-01
Supplement: b800458d.pdf [file b800458d.pdf]

## Electronic Supporting Information

# Discovery of New Series of Jatrophone and Lathyrane Diterpenes as Potent and Specific P-Glycoprotein Modulators†

Elisa Barile,<sup>a</sup> Marianna Borriello,<sup>b</sup> Attilio Di Pietro,<sup>c</sup> Agnès Doreau,<sup>c</sup> Caterina Fattorusso,<sup>b</sup>  
Ernesto Fattorusso,<sup>b</sup> and Virginia Lanzotti\*<sup>a</sup>

<sup>a</sup>*DISTAAM, Università degli Studi del Molise, Via F. De Sanctis, I-86100 Campobasso, Italy. E-mail: [lanzotti@unimol.it](mailto:lanzotti@unimol.it); Phone: +39 874 404649; Fax: +39 874 404652*

<sup>b</sup>*Dipartimento di Chimica delle Sostanze Naturali, Università di Napoli Federico II, Via D. Montesano 49, I-80131 Napoli, Italy*

<sup>c</sup>*Institut de Biologie et Chimie des Proteines, UMR5086 CNRS/Université Lyon1 et IFR128 BioSciences Gerland-Lyon Sud, Passage du Vercors 7, 69367 Lyon Cedex 07, France*

†<sup>1</sup>H NMR spectra for compounds **1–8**, purity criteria for isolated compounds, and minimum energy conformations obtained for each stereoisomers of **1**.

### Contents

|       |                                                                                                      |
|-------|------------------------------------------------------------------------------------------------------|
| S2-S9 | <sup>1</sup> H NMR spectra for compounds <b>1-8</b>                                                  |
| S10   | Purity criteria for target compounds <b>1,2,4,5,6,8</b>                                              |
| S11   | Fully optimized AM1 conformers of the possible four stereoisomers of <b>1</b> at C-8 and C-13 atoms. |
| S12   | Superimposition of two low energy conformers of 8 <i>S</i> ,13 <i>R</i> stereoisomer of <b>1</b>     |

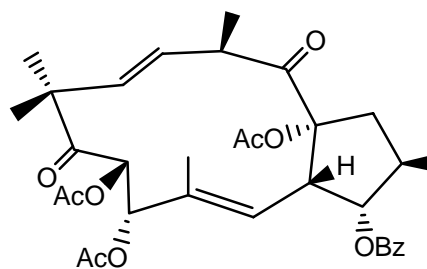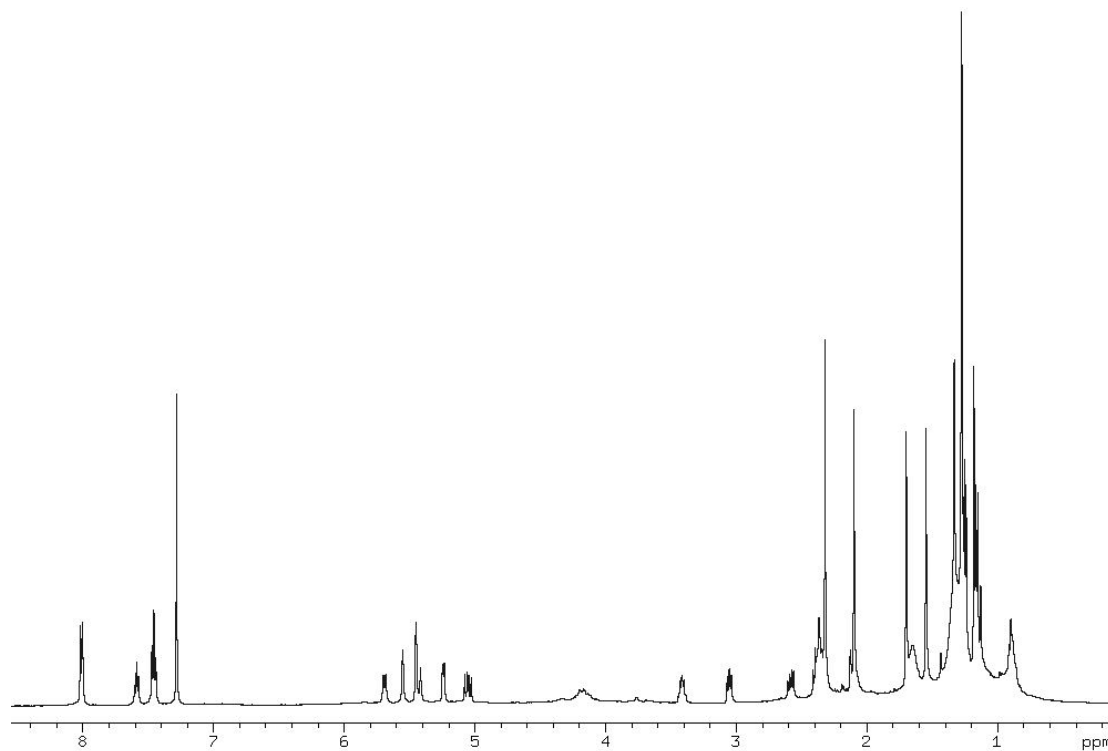

**Spectrum S1.**

<sup>1</sup>H NMR spectrum of compound **1** (500 MHz, solvent CDCl<sub>3</sub>)

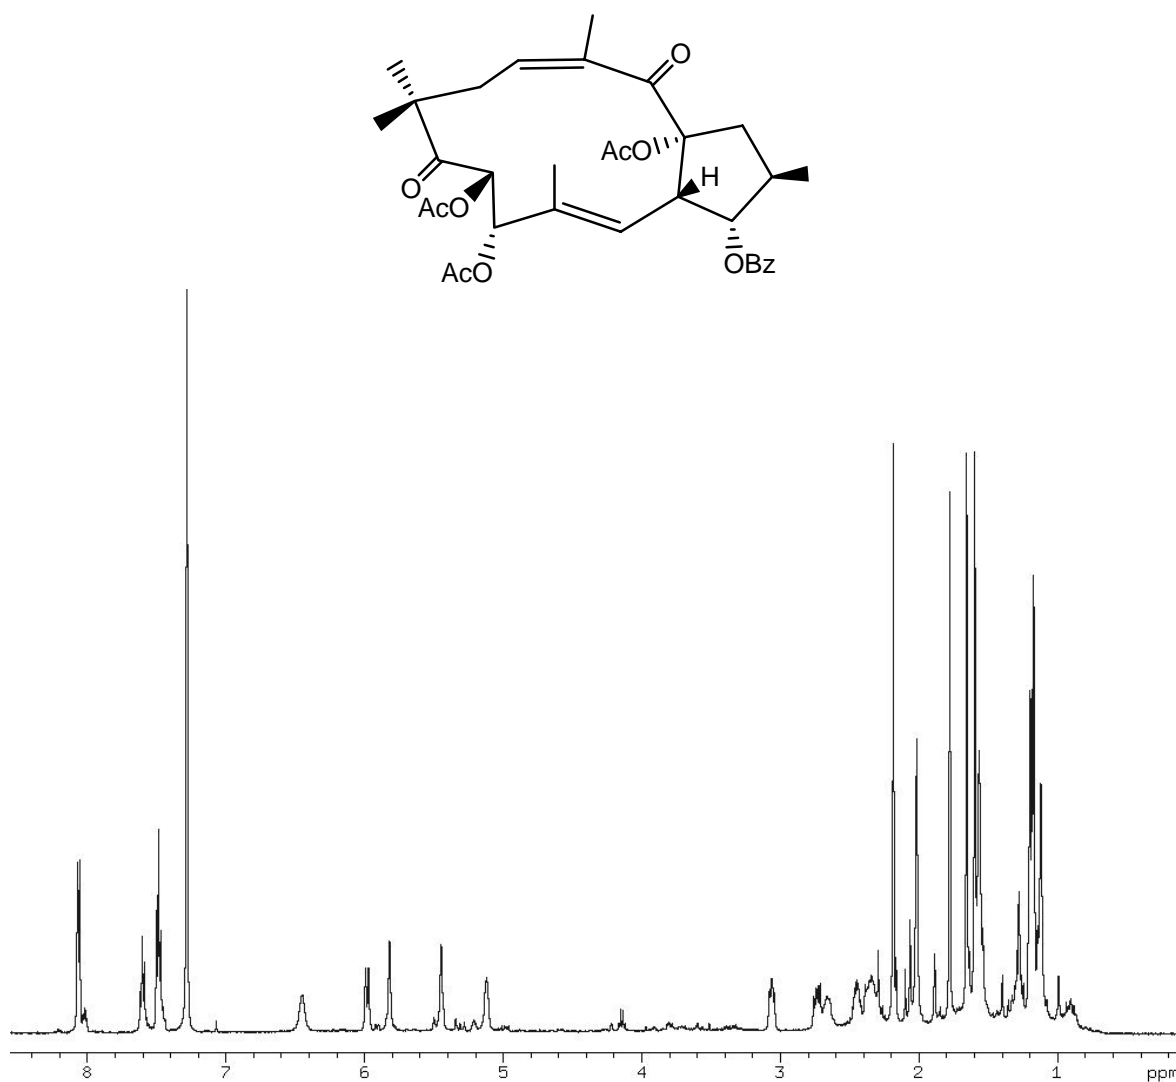

**Spectrum S2.**

<sup>1</sup>H NMR spectrum of compound **2** (500 MHz, solvent CDCl<sub>3</sub>)

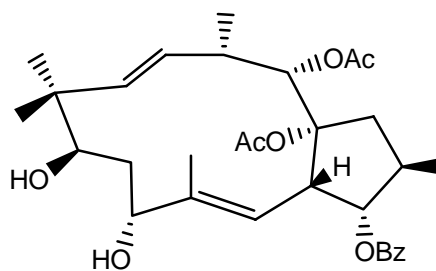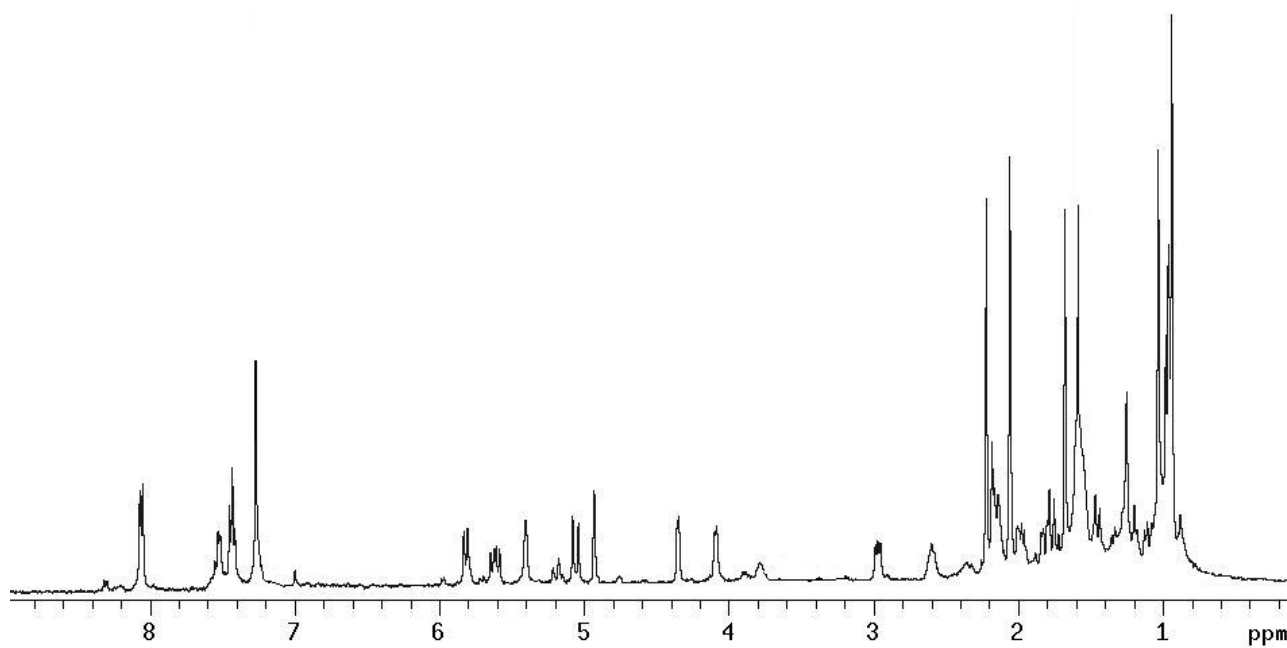

**Spectrum S3.**

<sup>1</sup>H NMR spectrum of compound 3 (500 MHz, solvent CDCl<sub>3</sub>)

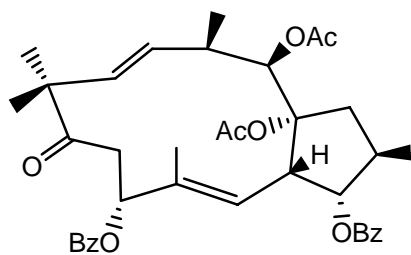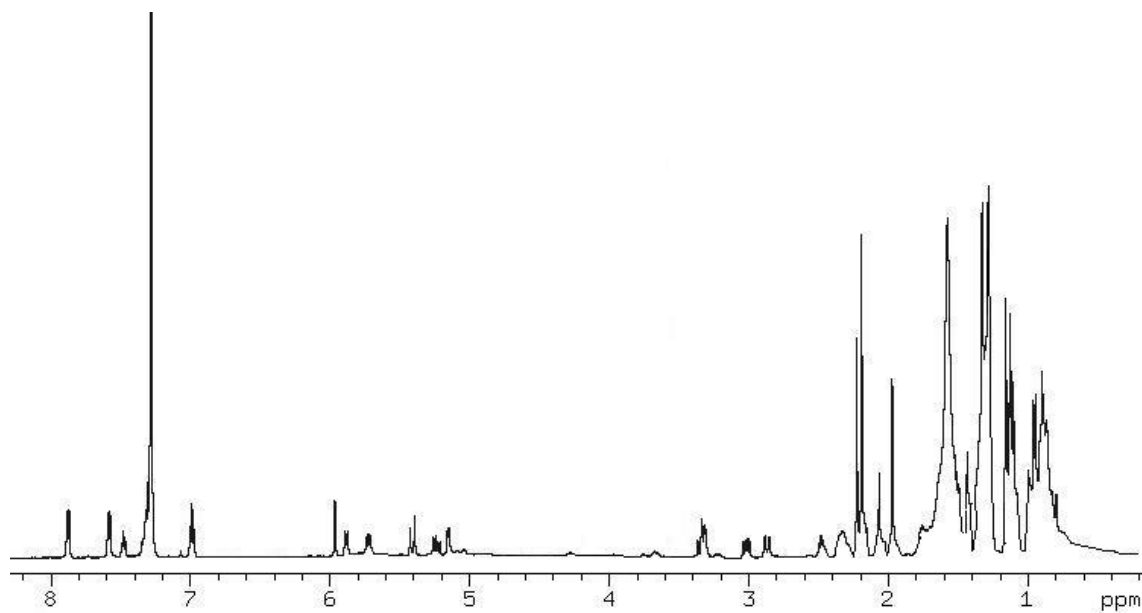

**Spectrum S4.**

<sup>1</sup>H NMR spectrum of compound **4** (500 MHz, solvent CDCl<sub>3</sub>)

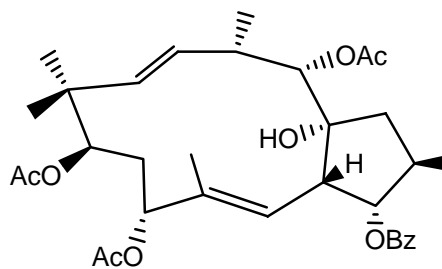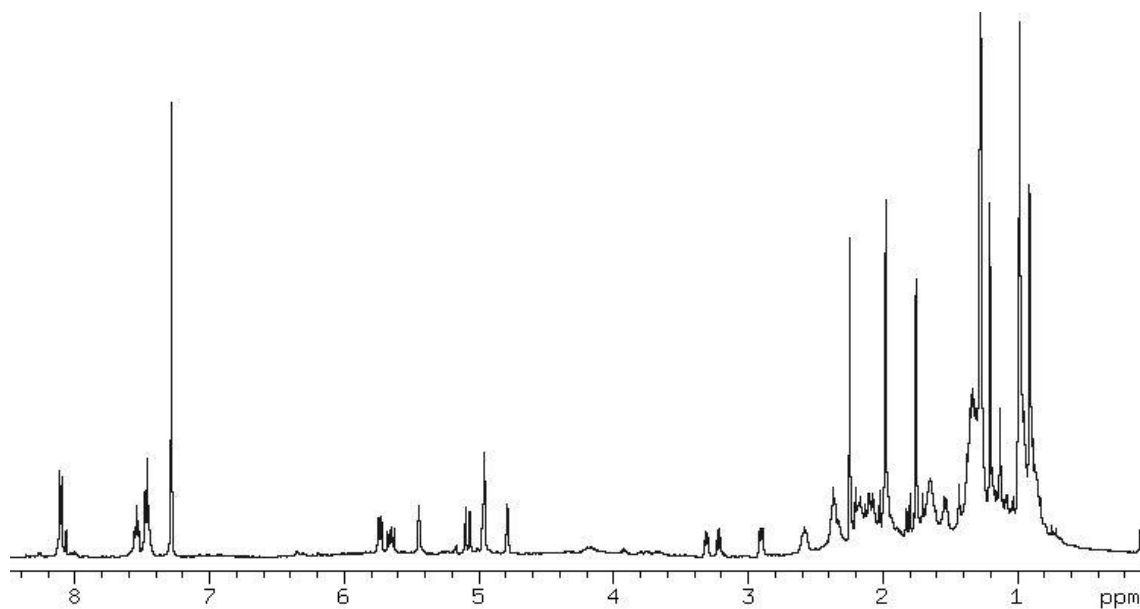

**Spectrum S5.**

<sup>1</sup>H NMR spectrum of compound **5** (500 MHz, solvent CDCl<sub>3</sub>)

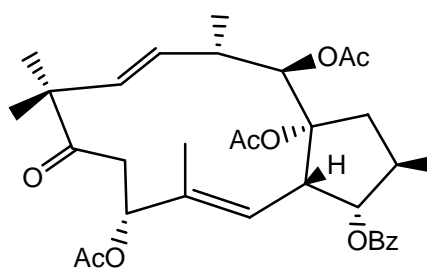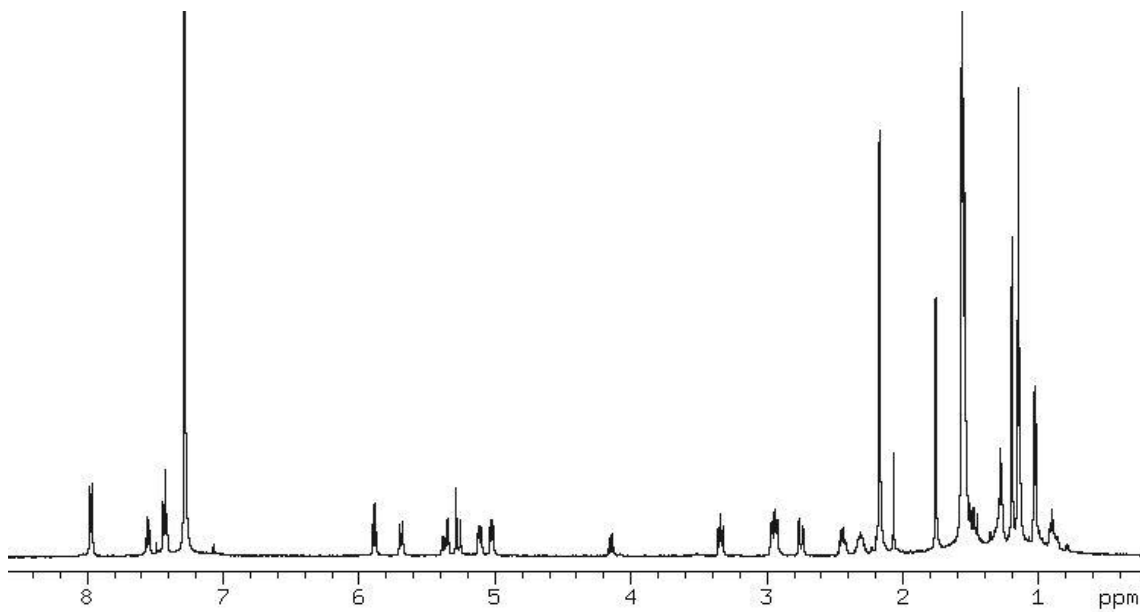

**Spectrum S6.**

<sup>1</sup>H NMR spectrum of compound **6** (500 MHz, solvent CDCl<sub>3</sub>)

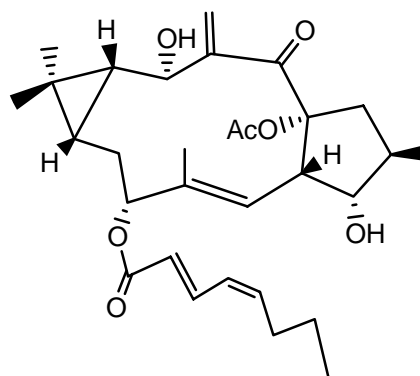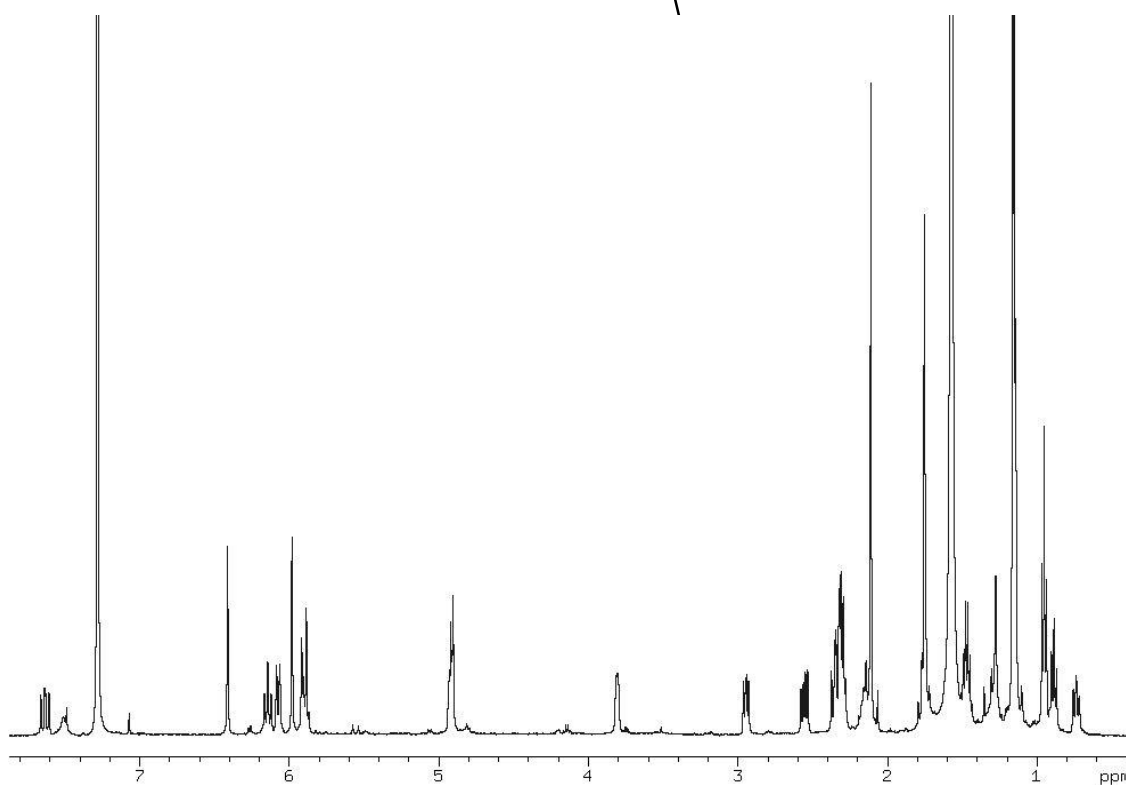

**Spectrum S7.**

<sup>1</sup>H NMR spectrum of compound 7 (500 MHz, solvent CDCl<sub>3</sub>)



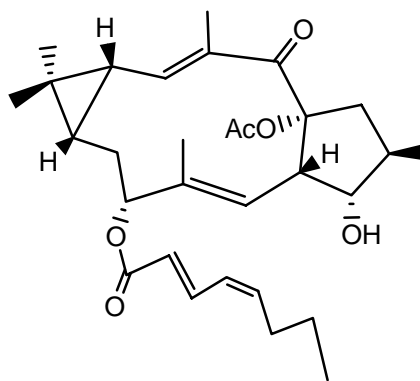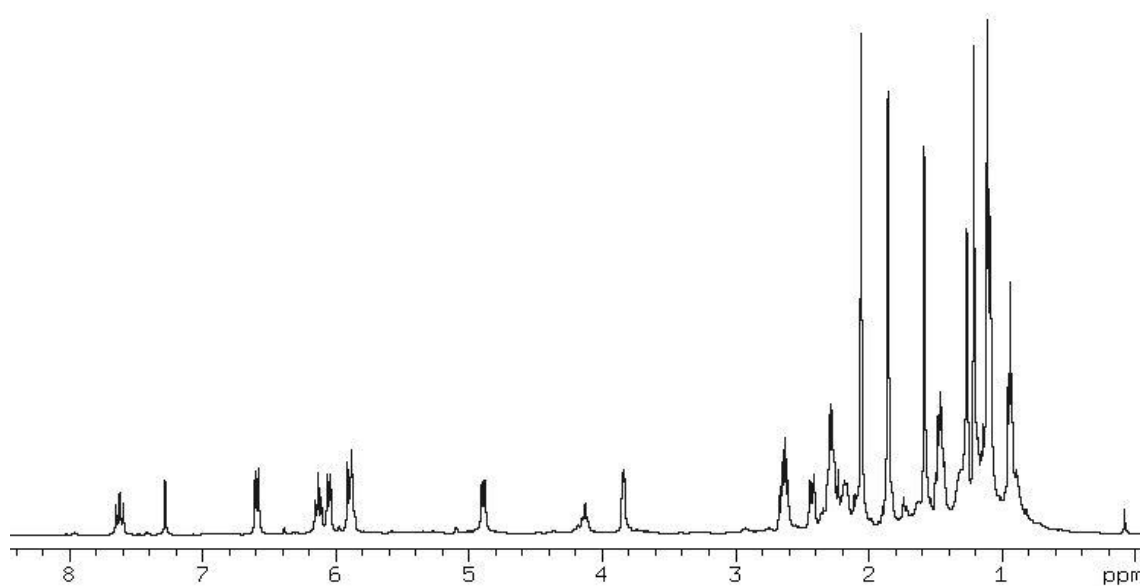

**Spectrum S8.**

<sup>1</sup>H NMR spectrum of compound **8** (500 MHz, solvent CDCl<sub>3</sub>)

**Purity criteria for target compounds.** The degree of purity of tested compounds was over 95% as indicated by the appearance of a single peak using two different HPLC eluent systems. Retention times ( $R_t$ ) are expressed in minutes.

Euphoscopin M (**1**): Hexane/EtOAc 75:25 with  $R_t$  54.6.  $\text{CH}_2\text{Cl}_2$ /EtOAc 8:2 with  $R_t$  36.4.

Euphoscopin N (**2**): Hexane/EtOAc 75:25 with  $R_t$  27.9.  $\text{CH}_2\text{Cl}_2$ /EtOAc 8:2 with  $R_t$  18.6.

Euphoscopin C (**4**): Hexane/EtOAc 85:15 with  $R_t$  75.0.  $\text{CH}_2\text{Cl}_2$ /EtOAc 9:1 with  $R_t$  50.0.

Euphornin (**5**): Hexane/EtOAc 75:25 with  $R_t$  59.4.  $\text{CH}_2\text{Cl}_2$ /EtOAc 8:2 with  $R_t$  39.6.

Epieuphoscopin B (**6**): Hexane/EtOAc 8:2 with  $R_t$  24.0.  $\text{CH}_2\text{Cl}_2$ /EtOAc 85:15 with  $R_t$  16.1.

Euphohelioscopin A (**8**): Hexane/EtOAc 75:25 with  $R_t$  42.0.  $\text{CH}_2\text{Cl}_2$ /EtOAc 8:2 with  $R_t$  28.2.

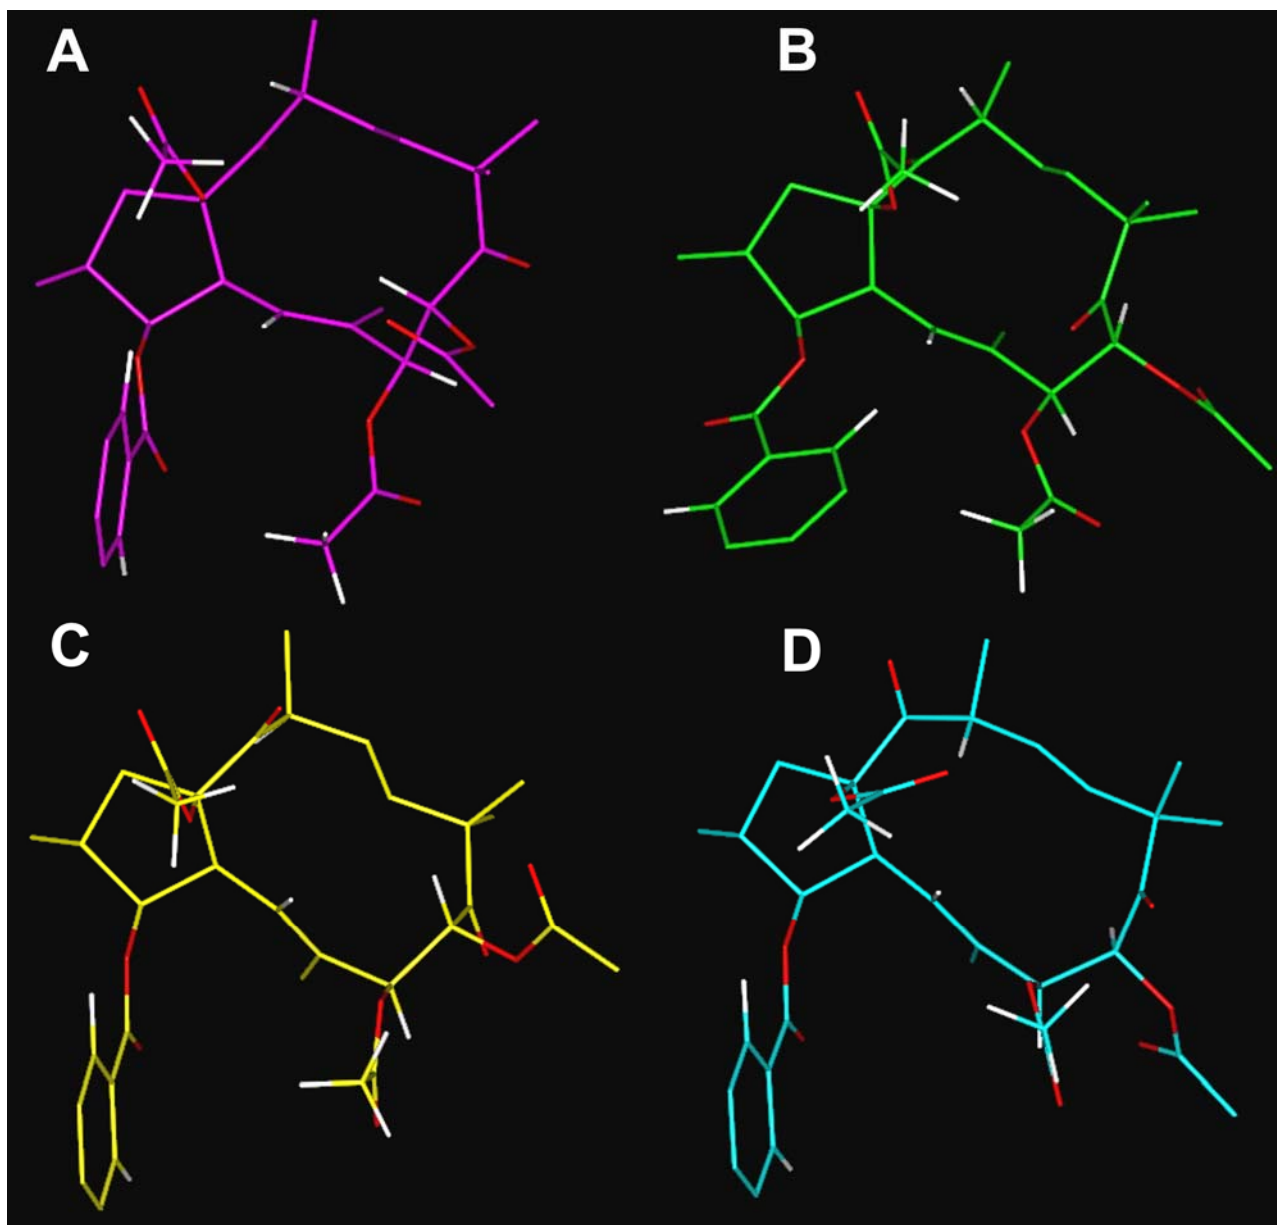

**Figure S1.**

**A-D.** Fully optimized AM1 conformers of the possible four stereoisomers of euphoscopin M (**1**) at C-8 and C-13 atoms: **A**)  $8R,13R$ ; **B**)  $8S,13R$ ; **C**)  $8R,13S$ ; **D**)  $8S,13S$ . Atoms are coloured by atom type; hydrogens atoms, with the exceptions of those useful for NMR discussion, are omitted for clarity of presentation.

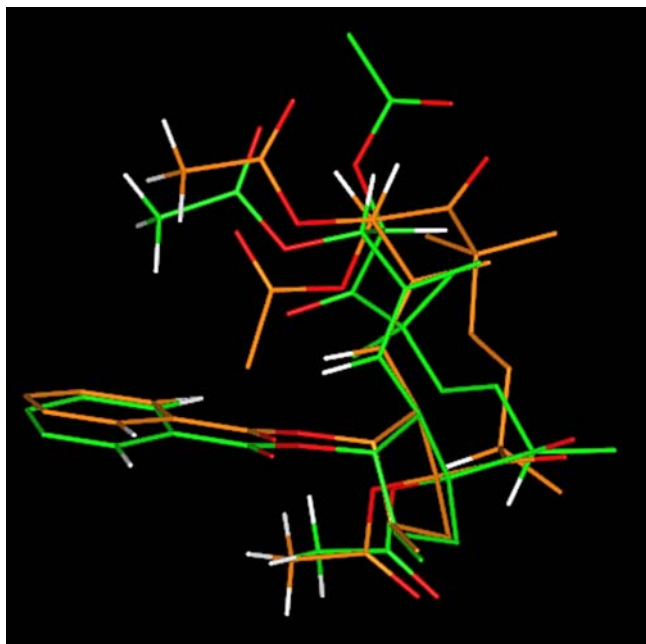

**Figure S2.**

Superimposition of two low energy conformers of 8*S*,13*R* stereoisomer of euphoscopin M (**1**). The relation between H-7/H-8 dihedral angle value and the relative orientation of C-7 C-3 substituents is evidenced. Atoms are coloured by atom type; hydrogens atoms, with the exceptions of those discussed *in NMR data* are omitted for clarity of presentation.
